- plasma from male-only donors *versus* mixed-sex donors on postoperative respiratory function in surgical patients: A prospective case-controlled study. *Transfusion* 2009; 49: 2434-41
64. Hall TL, Barnes A, Miller JR, Bethencourt DM, Nestor L: Neonatal mortality following transfusion of red cells with high plasma potassium levels. *Transfusion* 1993; 33:606-9
  65. Ratcliffe JM, Elliott MJ, Wyse RK, Hunter S, Alberti KG: The metabolic load of stored blood. Implications for major transfusions in infants *Arch Dis Child* 1986; 61:1208-14
  66. de Vroege R, Wildevuur WR, Muradin JA, Graves D, van OW: Washing of stored red blood cells by an autotransfusion device before transfusion. *Vox Sang* 2007; 92:130-5
  67. Knichwitz G, Zahl M, Van AH, Semjonow A, Booke M: Intraoperative washing of long-stored packed red blood cells by using an autotransfusion device prevents hyperkalemia. *Anesth Analg* 2002; 95:324-5
  68. van de Watering L, Lorinser J, Versteegh M, Westendorp R, Brand A: Effects of storage time of red blood cell transfusions on the prognosis of coronary artery bypass graft patients. *Transfusion* 2006; 46:1712-8
  69. Yap CH, Lau L, Krishnaswamy M, Gaskell M, Yui M: Age of transfused red cells and early outcomes after cardiac surgery. *Ann Thorac Surg* 2008; 86:554-9
  70. Fowler AA, Hamman RF, Good JT, Benson KN, Baird M, Eberle DJ, Petty TL, Hyers TM: Adult respiratory distress syndrome: Risk with common predispositions. *Ann Intern Med* 1983; 98:593-7
  71. Pepe PE, Potkin RT, Reus DH, Hudson LD, Carrico CJ: Clinical predictors of the adult respiratory distress syndrome. *Am J Surg* 1982; 144:124-30
  72. Hudson LD, Milberg JA, Anardi D, Maunder RJ: Clinical risks for development of the acute respiratory distress syndrome. *Am J Respir Crit Care Med* 1995; 151:293-301
  73. Chaiwat O, Lang JD, Vavilala MS, Wang J, MacKenzie EJ, Jurkovich GJ, Rivara FP: Early packed red blood cell transfusion and acute respiratory distress syndrome after trauma. *ANESTHESIOLOGY* 2009; 110:351-60

## ANESTHESIOLOGY REFLECTIONS

### “Olefiant Gas” Dollar-Bill Receipts

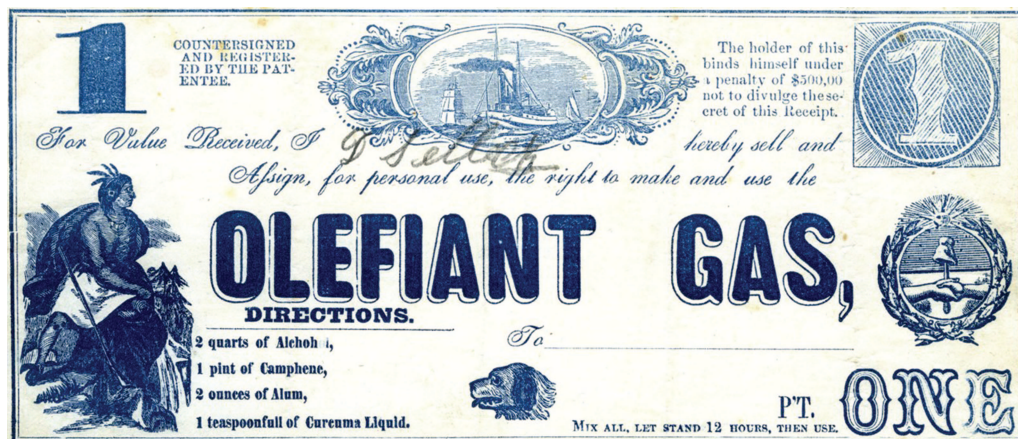

During the decades immediately before and after the American Civil War, many printers popularized advertising handbills and business receipts which resembled American paper money. Around 1858, a certain “D. Seller” paid \$1.00 as a patent royalty “for personal use, the right to make and use the OLEFIANT GAS.” Olefiant or “oil-making” referred to the alkene’s ability, in the presence of chlorine, to form oily liquids (such as “Dutch oil,” which was named after four Dutch chemists who produced it). Peak use of ethylene (“olefiant gas”) as a general anesthetic in America would not occur until the mid-1920s to the mid-1930s. (Copyright © the American Society of Anesthesiologists, Inc. This image appears in color in the *Anesthesiology Reflections* online collection available at [www.anesthesiology.org](http://www.anesthesiology.org).)

George S. Bause, M.D., M.P.H., *Honorary Curator, ASA’s Wood Library-Museum of Anesthesiology, Park Ridge, Illinois, and Clinical Associate Professor, Case Western Reserve University, Cleveland, Ohio. UJYC@aol.com.*
